# Supplementary material for: The impact of antibacterial peptides on bacterial lipid membranes depends on stage of growth
Source: Royal Society of Chemistry journal article supplement (doi:10.1039/d0fd00052c), 2020-06-25
Supplement: d0fd00052c1.pdf [file d0fd00052c1.pdf]

**SUPPLEMENTARY INFORMATION FOR**

**The Impact of Antibacterial Peptides on Bacterial Lipid Membranes Depends  
on Stage of Growth**

**Tzong-Hsien Lee<sup>1</sup>, Vinzenz Hofferek<sup>2</sup>, Marc-Antoine Sani<sup>2</sup>, Frances Separovic<sup>2</sup>,  
Gavin E Reid<sup>2,3</sup> and Marie-Isabel Aguilar<sup>1#</sup>**

<sup>1</sup>Department of Biochemistry and Molecular Biology, Monash University,  
Clayton VIC 3800, Australia

<sup>2</sup>School of Chemistry, Bio21 Molecular Science and Biotechnology Institute, University of  
Melbourne, VIC 3010, Australia

<sup>3</sup>Department of Biochemistry and Molecular Biology, University of Melbourne, Parkville VIC  
3010, Australia

**Corresponding Author:**

# Marie-Isabel Aguilar  
e-mail: [mibel.aguilar@monash.edu](mailto:mibel.aguilar@monash.edu)

**Two Videos accompany this manuscript:**

**Video S1**

Video showing the changes in **EGP**-derived SLB morphology after the addition of 20  $\mu\text{M}$  Mac1. The time/frame is 2sec/frame after Mac1 addition which is approximately 1/70 of the actual time (70 times faster).

**Video S2**

Video showing the changes in **SGP**-derived SLB morphology after the addition of 20  $\mu\text{M}$  Mac1. The time/frame is 2sec/frame after Mac1 addition which is approximately 1/70 of the actual time (70 times faster).
